# Supplementary material for: Comparative Analysis of Transcriptomes of Ophiostoma novo-ulmi ssp. americana Colonizing Resistant or Sensitive Genotypes of American Elm
Source: MDPI journal article supplement (doi:10.3390/jof8060637), 2022-06-16
Supplement: s1 [file s1]

**Supplementary Table S2:** Primers used for the qPCR amplification of candidate genes and reference genes to assess expression levels, and PCR primers for the confirmation of a complete RNAi cassette in positive transformants.

| Candidate and<br>reference genes | Oligonucleotide sequence (5' – 3')  | Primer<br>T <sub>m</sub> (°C) | Amplicon size (bp)<br>and T <sub>m</sub> (°C) |
|----------------------------------|-------------------------------------|-------------------------------|-----------------------------------------------|
| CYP52P6                          | qCyP52P6-F1: AGGATCTCTATGGCGAGGATGC | 61.5                          | 165, 81.3                                     |
|                                  | qCyP52P6-R: GGTAACCCAGCCAATGTTCTTG  | 61.9                          |                                               |
| AmtA                             | qAmtA-F3: ACTCCACGTCGTGCACA         | 61.5                          | 99, 85.5                                      |
|                                  | qAmtA-R: GCAGCGGGATGTTGTTGCT        | 61.6                          |                                               |
| Mad1                             | qMad1-F: CTTACGGCAGTGTCTCGGTTC      | 61.0                          | 167, 87.4                                     |
|                                  | qMad1-R: GGGAACAGGAACAGAGACCGA      | 61.4                          |                                               |
| Hex1                             | qHex1-F: AAGATGGGTTACTACGACGAGGAT   | 60.9                          | 176, 87.8                                     |
|                                  | qHex1-R: TGCAGGATCAGGATGTCACCA      | 61.2                          |                                               |
| CYP570AA4                        | qCyP570A4-F: GCGCCGCTTTGATATTGTTCTC | 60.9                          | 123, 80.2                                     |
|                                  | qCyP570A4-R: CTCTCAAAAACGGCCTCAATGC | 60.7                          |                                               |
| Cox2                             | qCox2-F2: TCAAGTTCAACGACGCCATCAA    | 61.1                          | 113, 82.0                                     |
|                                  | qCox2-R2: CATGGCAGAAAGTCCAGCAGA     | 60.6                          |                                               |
| Actin                            | Act-143-F: CGGAGAAGGACTCGTACGTTG    | 64.5                          | 105, 82.44                                    |
|                                  | Act-248-R: TCCATGTCGTCCAGTTGGTA     | 62.6                          |                                               |
| β-tubulin                        | Bt-827-F: GTGGCTCGTACTCTTTCCGTG     | 64.5                          | 127, 84.0                                     |
|                                  | Bt-954-R: ACGGAAGATAGCAGAGCAGGT     | 62.6                          |                                               |
| Chromosome                       | Psm1-166-F: CACCTCCGTTCCAGTCAACT    | 62.4                          | 147, 84.37                                    |
| protein 1                        | Psm1-313-R: CATCACCGGCATCGTCATCT    | 62.4                          |                                               |
| For amplification of             | RNAi PCR-F: CGGGTTCGTCTCCTCTTTCA    | 62.4                          | Varies with insert<br>(1,550 to 1,650)        |
| RNAi cassette                    | RNAi PCR-R: GCTTGGGGTTTCTGTAGGCT    | 62.4                          |                                               |
