# Supplementary material for: Comparative Analysis of Transcriptomes of Ophiostoma novo-ulmi ssp. americana Colonizing Resistant or Sensitive Genotypes of American Elm
Source: MDPI journal article supplement (doi:10.3390/jof8060637), 2022-06-16
Supplement: s1 [file s1]

**Supplementary Table S3:** Primers used to amplify specific gene fragments for producing and verifying OSCAR deletion mutants of *Ophiostoma novo-ulmi* ssp. *novo-ulmi*.

| Primer                  | 5'-3' Primer sequence*                                              |                                                                                                                                                  |
|-------------------------|---------------------------------------------------------------------|--------------------------------------------------------------------------------------------------------------------------------------------------|
| Oao1F_-1031_attB2r      | <b>GGGGACAGCTTTCTTGTACAAA<br/>GTGGAATACTGGCGGATTCTTC<br/>GACTC</b>  | Primers used for amplification of 1kb of the downstream region of <i>aox1</i> with site-specific recombination to produce the deletion construct |
| Oao1R_-3_attB1r         | <b>GGGGACTGCTTTTTTGTACAAA<br/>CTTGTCGAATTATTTTGGTCGC<br/>TGAC</b>   |                                                                                                                                                  |
| Oao1F_2507_attB4        | <b>GGGGACAACCTTTGTATAGAAA<br/>AGTTGTTGTGGTCAGTAGTGGA<br/>CAACTG</b> | Primer used for amplification of the upstream region of <i>aox1</i> with site-specific recombination to produce the deletion construct           |
| Oao1R_3632_attB3        | <b>GGGGACAACCTTTGTATAATAAA<br/>GTTGTCTTGTCATTTGCCATACG<br/>CGG</b>  |                                                                                                                                                  |
| Oao1F_236<br>Oao1R_840  | ACCTCGACCACAACCTCAAAG<br>ATGAGACAACCGGTGGAAGAG                      | Primers used for amplification of $\Delta$ <i>aox1</i> fragment                                                                                  |
| Bct2F_-1050_attB2r      | <b>GGGGACAGCTTTCTTGTACAAA<br/>GTGGAATTCCCAAACGGGCTCT<br/>ATTC</b>   | Primers used for amplification 1kb of the downstream region of <i>bct2</i> with site-specific recombination to produce the deletion construct    |
| Bct2R_-1_attB1r         | <b>GGGGACTGCTTTTTTGTACAAA<br/>CTTGTAATGAGGGAAAATGGCT<br/>ATG</b>    |                                                                                                                                                  |
| Bct2F_1890_attB4        | <b>GGGGACAACCTTTGTATAGAAA<br/>AGTTGTTTTTTGTTATTCTCTCAT<br/>TGCC</b> | Primer used for amplification of the upstream region of <i>bct2</i> with site-specific recombination to produce the deletion construct           |
| Bct2R_2903_attB3        | <b>GGGGACAACCTTTGTATAATAAA<br/>GTTGTGGGTCTGTCGCACATTA<br/>TC</b>    |                                                                                                                                                  |
| Bct2F_539<br>Bct2R_1111 | TCCACCTCCACATTCAAGACG<br>AAACCCATCTTTTGCTGACGC                      | Primers used for amplification of $\Delta$ <i>bct2</i> fragment                                                                                  |
| Opf2F_-953_attB2r       | <b>GGGGACAGCTTTCTTGTACAAA<br/>GTGGAAAGGCAGAATCGGACC<br/>GAGACGG</b> | Primers used for amplification 1kb of the downstream region of <i>opf2</i> with site-specific                                                    |

|                        |                                                                          |                                                                                                                                        |
|------------------------|--------------------------------------------------------------------------|----------------------------------------------------------------------------------------------------------------------------------------|
| Opf2R_-1_attB1r        | <b>GGGGACTGCTTTTTGTACAAA</b><br><b>CTTGT</b> GGTGGGAGTTCAGAGGT<br>TGAAG  | recombination to produce the deletion construct                                                                                        |
| Opf2F_2446_attB4       | <b>GGGGACAACTTTGTATAGAAA</b><br><b>AGTTGTTT</b> GCTTATGCCAGGG<br>ACGGACC | Primer used for amplification of the upstream region of <i>opf2</i> with site-specific recombination to produce the deletion construct |
| Opf2R_3468_attB3       | <b>GGGGACAACTTTGTATAATAAA</b><br><b>GTTGT</b> ACCATTTGCCTCCATGG<br>AAGC  |                                                                                                                                        |
| Opf2R_254<br>Opf2R_873 | TTGCTCCAACCTTCGGGTCTAC<br>GTCGCGTATGGGTCATTGG                            | Primers used for amplification of $\Delta opf2$ fragment                                                                               |

---
