# Supplementary material for: Comparative Analysis of Transcriptomes of Ophiostoma novo-ulmi ssp. americana Colonizing Resistant or Sensitive Genotypes of American Elm
Source: MDPI journal article supplement (doi:10.3390/jof8060637), 2022-06-16
Supplement: s1 [file s1]

**Supplementary Table S1: Nucleotide sequences designed and synthesized for the RNAi**

cassettes of each target gene and the modified pAN-7 transformation vector. Annealing sites for PCR primers are indicated.

| Sequence name and length (bp)    | Nucleotide sequence, forward primer annealing site ( <u>underline</u> ) for target genes and both forward and reverse annealing sites ( <b>bold</b> ) in the pAN7 transformation vector                                                                                                                                                                                                                                                                                                                                                                                                                                                                                                                                                                                                                                                                                                                                                                                                                                                                                                             |
|----------------------------------|-----------------------------------------------------------------------------------------------------------------------------------------------------------------------------------------------------------------------------------------------------------------------------------------------------------------------------------------------------------------------------------------------------------------------------------------------------------------------------------------------------------------------------------------------------------------------------------------------------------------------------------------------------------------------------------------------------------------------------------------------------------------------------------------------------------------------------------------------------------------------------------------------------------------------------------------------------------------------------------------------------------------------------------------------------------------------------------------------------|
| CYP52P6 RNAi Cassette<br>(1,011) | ACTAGTATCTCTCTGGCCGGAAGTCATCGGCATCCTCGCCATAGAGATCCTTGCGGCATGCATGGCATACACGCAGTAGCC<br>GACACCCTCGCCTTTGTGTACAAGCACGGGAGACTTGCCATCTGGACCGCCGCCAACAGGCAGGACCGTATCACGCATAGCC<br>TCGCGCGAGTTGACCGGGACGGAGGGGTACAGACGCAGGACTTCTTTGATGACACAGTGAGGTTAGTCATGTTCTTGAGC<br>TGGGTCTTGGTAGGAGGATCGGCAGCGGGACCAACGCCACATACACTCTCGACCTCCTTGCGCAGACGAGCCAGGACGTGT<br>TGGTGGCGTGCAAGAAGACGGAAGGTCCAGCCAAGACAACAGCCGGTGGTATCTCTGCCAGCAAGCAGCACGTTGAGTGC<br>CTGATCGCGCAACACAGTACGGTCTTGTGTCAAACGGGCTAGGATCTTGATAAACACATCGTGATCTTCATCATCGACAGTC<br>GCCTCTGCAATTTTGGCAGAAGCAGCAGCGCTTTGCCAAAGTTGGGGCCGAGCGACTTGTCATAGCCGACTCGACAAACG<br>TATGGCATGTCCGGCACGCATCCCGAAATTCCTTGCTACTCAACGTGCTGCTTGGCAGAGATACCACCGGCTGTTGTCTT<br>GGCTGGACCTTCCGTCTTCTTGACGCCACCAACACGTCCTGGCTCGTCTGCGCAAGGAGGTCGAGAGTGTATGTGGCGTTG<br>GTCCCGCTGCCGATCCTCTACCAAGACCCAGCTCAAGAACATGCACTACCTCCACTGTGTCATCAAAGAAGTCTGCGTCTG<br>TACCCCTCCGTCCCGGTCAACTCGCGCGAGGCTATGCGTGATACGGTCTGCCTGTTGGCGGCGGTCCAGATGGCAAGTCTC<br>CCGTGCTTGTACAAAAGCGAGGGGTGTCGGCTACTGCGTGTATGCCATGCATCGCCGCA <u>AGGATCTCTATGGCGAGGATG</u><br><u>CGATGACTTCCGGCCAGAGATGGTACC</u> |
| AmtA RNAi cassette<br>(1,022)    | ACTAGTCCTTCTCTGCGGCCAAAGGCCATGGCCATGCCGATGCCGTGCATGCCGACGACACCGTGTGCACGACGTGGGA<br>GTCGCGCGGGCCAGACCACCGGCTCCGTGGCGATCGGCCGAGTCCATGGAGCCGGTCTCGCCGTGGGCTCGTTGAGCAC<br>CTCGCGCGTCAGCTCGACATAGTCGTAGGCAAACTCGCCAATCTCGCTGTCGTCGATGCCAGGATCTCGGCCTTTCGCTGG<br>CGCGCAGATGCAGGCCGGGATCATGTTTCATCACAACAGGATCAGGGTGGTGCCGACAAACGAGTAGCAGCCGCCGCTG<br>AAGGAATCGGCCAGCTGGATGCCAGCTGGGCCAGTGGTGGTTGAGCCAGCCGCCCTGGATGACCTGGACACCGTCGAG<br>GTGGGCAATGTAGTCGGCCGCAAGAAGGCTGTGCAAAATGTTGCCGACGAGGCCGCCAATGGCGTGACACGGCGAAAATGT<br>CGAGGGCGTCGTCGATGCGCAGCAGGAACCTGAGCTTGGTGATAGTTGGCAAATGAGGCGCCGAGCAGCCATAGGGC<br>ACGGCGGCCAAGCGGGCACGTAGCCAGAACCAGGCGTGATAGCGACGAGGCCGACGGTGTCCAGGTCATCCAGGGCGGC<br>TGGCTCAACCACCACTGGGCCAGCTGGGCATCCAGCTGGCCGATTCTTCAGCGGCGGCTGCTACTCGTTTGTGGCACCA<br>CCCTGATCCTGTTGTGATGAACATGATCCCCGCCTGCATCTGCGCGCAGCGAAGAGGCCGAGATCCTGGGCATCGACGA<br>CAGCGAGATTGGCGAGTTTGCCTACGACTATGTGAGCTGACGCGCAGGTGCTCAACGAGGCCGACGGCGAGACCGGCT<br>CCATGGACTCGGCCGATGCCACGGAGCCGGTGGTCTGGGCCCGCGC <u>ACTCCACGTCGTGCAC</u> CGGTGTCGTCGGGCA<br>TGCACGGCATCGGCATGGCCATGGCCTTTGGCGCGCAGGAGAAGGGGTACC      |

|                                           |                                                                                                                                                                                                                                                                                                                                                                                                                                                                                                                                                                                                                                                                                                                                                                                                                                                                                                                                                                                                                                                                                                                                                                        |
|-------------------------------------------|------------------------------------------------------------------------------------------------------------------------------------------------------------------------------------------------------------------------------------------------------------------------------------------------------------------------------------------------------------------------------------------------------------------------------------------------------------------------------------------------------------------------------------------------------------------------------------------------------------------------------------------------------------------------------------------------------------------------------------------------------------------------------------------------------------------------------------------------------------------------------------------------------------------------------------------------------------------------------------------------------------------------------------------------------------------------------------------------------------------------------------------------------------------------|
| Mad1 RNAi cassette<br><br>(1,087)         | ACTAGTGGAACCGAGACCGTAGCAGAGCTGGTAGGCACCGAGGCGGGACGGTGGGGACCGACGAGACGACGACGGGAA<br>CCGAGACACTGCCGTAAGGGACCGAGGCGTAGCCAGTGGGGACCGACGAGATGGCAGGGACCGACGAGGACTTGGTGGC<br>GGGGCTGGTAGGGTGGTCTCGACGGTGGTGGCGGTAGAGGTGGAGGAACTGCAGCCGAAAGAAACGGTAGAGACGGA<br>AACGCTGCAGGTAGTGCTCTTGGGGTGCTTGGGCTGCTTAGGGTAGACAATGGTGACGCCTTGGCACCACCGCACTTGTCG<br>TTCTTAATGACGCTGCCCTTGCTGGAGCAGGAGCTGGTCTGCTTGACGGTAGAGCCATGCCCATGTCGTAGTGGAACCTGA<br>GGTCGCAGTCGAACTCGGTGGTGATGTGGAACTCGGTCACGGAGAAGGAGTCGACGCTCTTGGAGTCCTTGAGGAGAAC<br>GAGGGGGACTTGTCGGCATCGACGTGGGAGACACCGGGCGTATTTGCTGCCGTAGCTGCCCGGTAGCTGCCGCCGTAG<br>CTGCCCGCTGCTGCCACCGTAGCTGCCACCGCTGTTGTCATCGCCGTAGCTGCCACCGTAGCTTCCACCGTAGCTGCCGTC<br>TCCGTGACCGAGTTCCACATCACCACCGAGTTCGACTGCGACCTCGAGTTCCTACTACGACATGGGCGATGGCTCTACCTGCA<br>AGCAGACCAGCTCTGCTCCAGCAAGGGCAGCGTCATTAAGAACGACAAGTGGGTGGTCCCAAGGCGTGCAACATTGTCT<br>ACCCTAAGCAGCCCAAGCACCCCAAGAGCACTACCTGCAGCGTTCCGTCTCTACCGTTTCTTTCGGCTGCAGTTCCTCCACCT<br>CTACCGCCACCGTCGAGACCACCCCTACCAGCCCCGCCACCAAGTCTCGTCGGTCCCTGCCATCTCGTCGGTCCCCACT<br>GGGTACGCTCGGTCC <u>TTACGGCAGTGTCTCGGTTCC</u> CGTCGTCTCGTCGGTCCCCACCGTCCCCGCTCGGTGCCTAC<br>CAGCTCTGCTACGGTCTCGGTTCCGGTACC |
| Hex1 RNAi cassette<br><br>(1,010)         | ACTAGTACGGGATAGTGACAGTGTTGGCGGGAGTCTCAGACTCGCGGCGAAGCCGCGCAAGGGGTGCTGGCGCGGACA<br>GGCTCGCGGTACTCAGCGACCTCGTTGGAGGGCTCGCGGGCATCCTCGTCGTAGTAACCCATCTTGTTGGATTGCGGGAAA<br>TGGTTGAAGGGGCGATGATTTCTTGGGTGACCTTAGTCTTGCTGAAAGTGTGCCCTGGGACGGACAACAGGAATGTCGA<br>TGGTGGTGTCTGGTACGATGACTGTTGCGACTGCTCAGCGAAGCGGCCGGTATCAACAGTGGATTGAAAGAACTAGCTT<br>CCTCACGGTAGTGGGCTTGAAACGTTTGCGGTATTGCGCTCGGCAACGTCAATTGCAGAGTCGTGGCTGGAGCGACGGG<br>ACTCAAAGTCTACAGAGGCCTCAAAGGTCGTGTGAGGACGGTTTTACGAATAAATTCTTGGCGGACACCAGGACGGTAGC<br>GTTCTCTTACGAGTGATGCGAACCTCTTCTCCCGTAAGGGTAGCTGATGATGTTGGACTCGTTGGCAACGTGAGAAGA<br>GTATTGACCTTCCGTCCGGGCCGTTGTTGGTGATGAGGTAGCTGTCCAGCCACGACTCTGCAATTGACGTTGCCGAGCGCG<br>AATACCGCAAACGTTTCAAGCCAGCTACCGTGAGGAAGCTAGTTCTTTCGAATCCACTGTTGATACCGGCCGCTTCGCTGAG<br>CAGTCCGAACAGTCATCGTACCAGGACACCACATCGACATTCCTGTTGTCGTCCCCAGGGCAGCACTTTCAGCAAGACTAA<br>GGTCACCCAAGAAATCATCGCCCTTCAACCATTTCGCGAAATCCAACA <u>AGATGGGTTACTACGACGAGGAT</u> GCCCCGCGAG<br>CCCTCCAACGAGGTCGCTGAGTACCGCGAGCCTGTCCGCGCCAGCAGCCCTTCGCGGGCGTTCCGCCGAGTCTGAGACTC<br>CGCCAACTGTCACTATCCCGTGGTACC                                                                                    |
| CYP570AA4 RNAi<br>cassette<br><br>(1,041) | ACTAGTCGCACGTTTCATGTCGCTCTGAATAAAGATGCAGCGTTGAAGGATTTCCACGGGTGGGCAGGGTCGACGAGAACA<br>ATATCAAAGCGGCGCAGCAGCTCGACATAGGCTTTGTTAAGTTCAATCATGGCAATATTCTTCCAAGACACTCGTAGCGGCT<br>ACCACCACCAAAGTCAAGCATGACCGTGTGTCATCAGCTTGATCCGCTCAGTGGGAATGTCCATCCAGCGATCTGGGCGG<br>AACAGGTTGGCATCTTACCAAAGATAGTCTTGTGCGCATAACGGGCCATGGTGCCAGGCGACAGACGTACCAGCAGGC<br>ACGCGGTAGCCACAAATTCGTATCAGTCTTTGAGACCTTAGGAAGAAGACCGGTGGCAGGTGGCCACATGCGGAGACCT<br>TCGCGGATAACAGCTTGAAGAAAGGGGAACTGGCAGCTTCGGCATCGGTAATCGGCGAGCTGATGCGGCCAGCACGGAT                                                                                                                                                                                                                                                                                                                                                                                                                                                                                                                                                                                                                                                    |

|                                                           |                                                                                                                                                                                                                                                                                                                                                                                                                                                                                                                                                                                                                                                                                                                                                                                                                                                                                                                                                                                                                                                                                                                                                                                  |
|-----------------------------------------------------------|----------------------------------------------------------------------------------------------------------------------------------------------------------------------------------------------------------------------------------------------------------------------------------------------------------------------------------------------------------------------------------------------------------------------------------------------------------------------------------------------------------------------------------------------------------------------------------------------------------------------------------------------------------------------------------------------------------------------------------------------------------------------------------------------------------------------------------------------------------------------------------------------------------------------------------------------------------------------------------------------------------------------------------------------------------------------------------------------------------------------------------------------------------------------------------|
|                                                           | <p>ACCCTCATCGATTTCCTTTGCAAGGTGCACATAAACGTGTGGGTTTGAATGAGGTAGAGCAAGGTTGAACGTATGGCCGTG</p> <p>GCTGATGTGTCGGAGCCAGCAATAATCTGGACGACGGCCCTTTCTCAAGCTGTTATCCGCGAAGGTCTCCGCATGTGGCCA</p> <p>CCTGCCACCGGTCTTCTTCTAAGGTCTAAAGACTGATGACGAAATTTGTGGCTACCGCGTGCCTGCTGGTACGTCTGTGCG</p> <p>CTGGGCACCATGGCCGTTATGCGCAACAAGACTATCTTTGGTGAAGATGCCAACCTGTTCCGCCAGATCGCTGGATGGAC</p> <p>ATTCCCACTGAGCGGTACAAGCTGATGGACAACACGGTCATGCTTGACTTTGGTGGTGGTAGCCGTACGAGTGTCTTGGA</p> <p>AGAATATTGCCATGATTGAACCTAACAAGACCTATGTCGAGCTGCT<u>GCGCCGCTTTGATATTGTTCTCGTCGACCTGCCAC</u></p> <p>CCGTGGAAATCCTTCAACGCTGCATTCTTTATTAGAGCGACATGAACGTGCGGGTACC</p>                                                                                                                                                                                                                                                                                                                                                                                                                                                                                                                                                     |
| <p>Cox2 RNAi cassette</p> <p>(1,021)</p>                  | <p>ACTAGTCAAAGACTTTGCGAAGTGCTTGTAGCTTTTATCAATTGCATCTTTGGGATAAAGCTCATCCATGAAGGAAGGACG</p> <p>CTGGACATTTGCATCGTTATGTTGATGGCGTCGTTGAACCTGAGGAATATGTCTACAAGCTCGGGATGGTCGTATGCATCGG</p> <p>CACCGAGCATGCAACGCGCGCTGACAGTCGTGCTGAATTTGTCCATATAGCCGCTCAATGTCTCGTGGGTGGCAGAAGTCAT</p> <p>GCCTGTGCGGAACAGTGGGTTGTTGGCAAGAAAGTGCTTGGCGCGGCTTCCATAGTGTGCCGAAAGCGCGAATGTTGGC</p> <p>TGGGTGCGCGAGGTGTGTCGGAGTAGAGTTGCGTGAAGGTTGGTGGAAATGTTTCTTCCGAGGAAGATGGGTGCTCC</p> <p>GAGAATCTCAAAGAACTGGTCAATGTTAAAGTAGACTTGGTATGGGTTGTATCCTGCATCATCTGGAGATCGTGGGGTG</p> <p>GGACAGAACGTAATGGGTCTGTGGTCCGAGATGAATGCCAAAAGCCCTGGATGGACTGTTGCGGTTTCCAGCAGCTGAAA</p> <p>TCCTTGACAAGAACAGACTTGGCGTCTTGCTGAAAGGCCCGAGCACCCATCTTCTCGGAAAGGAAACATTTCCACCAAC</p> <p>CTTCACGCAACTCTACTCCGACACACCTCGGCGACCCAGCCAACATTCGCGCTTTCGGCAGCACTATGGAAGCCGCCCA</p> <p>AGCACTTTCTGCCAACAACCCACTGGTTCGACAGGCATGACTTCTGCCACCCACGAGACATTGAGCGGTATATGGACAA</p> <p>ATTAGCAGCACTGTGAGCGCGCTTGATGCTCGGTGCCGATGCATACGACCATCCCGAGCTTGTAGACATATTCCTCAAGT</p> <p><u>TCAACGACGCATCAACATAACGATGCAAATGTCCAGCGTCCTTCTTCATGGATGAGCTTTATCCCAAAGATGCAAATTGAT</u></p> <p>AAAAGCTACAAGGCATTCGCAAAGTCTTTGGGTACC</p>                                 |
| <p>pAN7-1 transformation</p> <p>vector</p> <p>(3,024)</p> | <p>GGATCCGGGGTTTAACGGTCCCATGTCAACAAGAATAAAACGCGTTTTTCGGGTTTACCTCTTCCAGATACAGCTCATCTGCA</p> <p>ATGCATTAATGCATTGACTGCAACCTAGTAACGCCTTCAGGCTCCGGCGAAGAGAAGAATAGCTTAGCAGAGCTATTTTCAT</p> <p>TTTCGGGAGACGAGATCAAGCAGATCAACGGTCGTCAAGAGACCTACGAGACTGAGGAATCCGCTCTTGGCTCCACGCGAC</p> <p>TATATATTTGTCTAATTGTACTTTGACATGCTCCTCTTCTTACTCTGATAGCTTGACTATGAAAATTCGTCACCGCCCTG</p> <p>GGTTCGCAAAGATAATTGCATGTTTCTTCTTGAACCTCAAGCCTACAGATCTGGGGTAAGAAGCGTGAAAGAGAAGAGCA</p> <p>GAAGCGTAGAAGGGTAGAAGAGTGAAAGAGAAGAACAAGAAAGAGTAGAAGAGTAAAAAAGAAGAATA</p> <p>GAAGACAGACACTTGTTATCGAGGCTATCTGATAACTTTGATCATGAGCTTTTCGATGAGATCTAGTCCACAACGGCAGCAA</p> <p>CACCTACTCAGTAGCATAATTTATGATAATTTGGCGAGCAATAGAGCCTGTACAGTCAGTTGTCTCGCGAGCCAAGGTTGCTA</p> <p>TCTTCCACTTTATGCGTAATTTATTTCTCAAATGATCCTCAGTCTTCCCTTTATTCTTGGGCACGGCGAAACCGACAGT</p> <p>CGAAAGAACTGGCATAAGTAAGTAATTATGCAAACGACAAGCAGTGCAAATAGCAGAAACACCAAGGTCGGGGAATT</p> <p>GGAGCATGGCATCTCAGTATCAGGTCAATTCGAACGTGCTCTGGCCGGCCTATTAGAAAAGTGCTGCCACTCAAG</p> <p>CCACTCACAGGGAAGGGCCGCCGACGAGGTGAGATATGAGGGGAATAATTGATGCAGCGCAGGCTAGTATTATCTTATTA</p> <p>TTCTATATTGTGCTCCGCTATGCCTGCATTATTTGCTCCTCCTTCTTGATTGCTGCTATTGACAAAGCCCAAGCAAGACACGT</p> |

---

CGCCATGCAGACAAGCCTCTACTCTTTCCAGTTGCTCTCTTAGTTCTGCATCTGCTGTATATTGCTTATATTCTTGATACGAA  
TACCTATATTGTACTIONGATTCTATTCCCGGCGAGCCCGATGTCGCCGAACGCCTTATGACGTATTTACATTGCAGCTCGTTAAT  
TCCTCATCTCTAATATCTAATATCTAGTATCTAATATCTTATCTACATCCACCCAGTATCTCATCATCCGGTCTCTTTGCGGTGTT  
TCTGTCATACTATCACACGGGGCTGTAAAGTGCTACGAGATACTGCGGGATGGTGATCATGCAATTCGGAAAGCGCGCTTTG  
AAAGTCGTAAAGTCGAAAAGTCAATCAGACTAAAGAGGCAACTACGACGCGCGCGCTCTTCTCAAATTCGAAGTACGAC  
AGACACCTACACCCACGCAACTGTCGGCCTGCCTTTTAGCGAACAGCGAGCAACAGCTGTCACTCCTCAGCATCCCGCCAAAC  
AAAAAAGTCTCGTGTTCCCTACAGCTGTCTGACTCTGCCAGCTCCAATTATACCCAGTATTCTCTACGTAAATAGTGCGTGT  
AATGCCTCTAAATACACCGTCCCCCAGATCGTCCCTCTCAACCGATCGTTTCTTTTGGGCATAGCTCTGTCGGGAAGCTC  
ACACGGTAGCTTTATTAATAATAATAAATCTTTTATTCTTCGACTTGTGCGTGGAGTCCAGCTCGACGACATCATACGTTCC  
ACAAATGCGTCCTTGTCTCTAGTCCTTTCTCAAGTCGTCGAGTCTCTTACCACTGCTGTACGACTATCTTCTCATACTGCAT  
CGCCGTTGACCGTTTGTGGCAGTAGCTTGCTCTGCCGCTATCGTCCCTCCTTCCCTCTCCTCTCCTCTCCTCTAGCTCTTTC  
CTCTTCTCTTTCAAGATTGTATCGTCTCCACCTCCGTTCTCTTGGCCTTGTCTTGTCTTACTCTTTTCTGTGTGCTT  
CGCACTTGCTACTCCAATTGCGCGTACTCCTCTACTACTACTCCTTTGGGAAAGAGCTGGCAAAGAGCTGTTGCTAGCCTCT  
AACTACCAACGGTAATACGTCATGAGCTCTTGTAACTACTAGCTTATTGAGAACATATCGTATTAGTGCAGGGAGAAGTAC  
TAACGATGATACTATTATTTCTGCCCCCTGTAGCTTTTCAATACTATGCTGCTCCAATATCACCGTGGAGACGTCCTCCAG  
CTCCTCCTCGTGTCTCCCAACTCCCAACAGGAGTCTTT**CGGGTTCGTCTCCTCTTT**CAGGTCCATCTCTCCTTCCCTCCGAGT  
ATATATAGTCGACCTCGCCACCTCTGGACAATTCTTTGTCTCGTCTCATATCTCATCTCATCAACTCATCTTCCCTCTTCTCT  
CTCTTCTCTACAATTACAATCTACATCTAAAGGTTATAGCTTCTTATACCAACTTACTACCATAACCACTCTACCTTACACATCC  
GTCAATACTAGTATCGATGGCGGCCATGCGAAGCCCGGGCGCGGTACCAACGGTCCCATGTCAACAAGAATAAA  
ACGCGTTTTCGGGTTTACCTCTCCAGATACAGCTCATCTGCAATGCATTAATGCATTGACTGCAACCTAGTAACGCCTTCAGG  
CTCCGGCGAAGAGAAGAATAGCTTAGCAGAGCTATTTTCATTTTCGGGAGACGAGATCAAGCAGATCAACGGTCGTCAAGA  
GACCTACGAGACTGAGGAATCCGCTCTTGGCTCCACGCGACTATATTTGTCTCTAATTGTACTTTGACATGCTCCTCTTCTT  
TACTCTGATAGCTTGACTATGAAAATCCGTACCAGCCCTGGGTTGCGAAAGATAATTGCATGTTTCTTCTTGAAGTCTCAA  
**GCCTACAGAAACCCCAAGCTT**

---
